# Supplementary material for: Investigation into Polyphenol Profile and Biological Activities of Enriched Persimmon/Apple Smoothies during Storage
Source: MDPI journal article supplement (doi:10.3390/foods12173248), 2023-08-29
Supplement: s1 [file s1]

# Investigation into Polyphenol Profile and Biological Activities of Enriched Persimmon/Apple Smoothies During Storage

Katarzyna Angelika Gil, Paulina Nowicka, Aneta Wojdyło, and Carlo Ignazio Giovanni Tuberoso

Table S1. Codes and composition of the smoothies’ samples.

| Sample   | Content                                                                                |
|----------|----------------------------------------------------------------------------------------|
| Dk/Md    | <i>Diospyros kaki</i> fruits puree and <i>Malus domestica</i> fruit juice (25:75, w/w) |
| Dk/Md+Cs | Dk/Md + <i>Crocus sativus</i> petal’s juice (99.95:0.05, w/w)                          |
| Dk/Md+Mc | Dk/Md + <i>Myrtus communis</i> purple berries extract (95:5, w/w)                      |
| Dk/Md+As | Dk/Md + <i>Acca sellowiana</i> flowers (95:5, w/w)                                     |
| Dk/Md+Au | Dk/Md + <i>Arbutus unedo</i> fruits puree (95:5, w/w)                                  |

Table S2. Sensory evaluation of Smoothies (5° hedonic scale).

| Sample   | Qualitative parameters |               |               |               |               |
|----------|------------------------|---------------|---------------|---------------|---------------|
|          | Colour                 | Aroma         | Taste         | Consistency   | Desirability  |
| Dk/Md    | 3.10 ± 0.74 bc         | 3.4 0± 0.84 a | 3.40 ± 0.97 a | 2.20 ± 0.63 a | 3.10 ± 0.57 a |
| Dk/Md+Cs | 3.00 ± 0.82 bc         | 2.90 ± 0.99 a | 3.1 5± 1.06 a | 2.60 ± 0.84 a | 3.15 ± 0.88 a |
| Dk/Md+Mc | 4.50 ± 0.53 a          | 3.60 ± 0.97 a | 3.1 5± 0.94 a | 3.00 ± 0.94 a | 3.45 ± 0.96 a |
| Dk/Md+As | 2.10 ± 0.99 c          | 2.75 ± 1.18 a | 2.1 0± 0.99 a | 2.20 ± 1.23 a | 1.80 ± 1.03 a |
| Dk/Md+Au | 4.20 ± 0.42 ab         | 3.50 ± 0.85 a | 3.70 ± 0.95 a | 2.70 ± 0.95 a | 3.15 ± 0.94 a |

Data are given as mean ± standard deviation (*n* = 3). Mean values within a column with different letters (a-c) are significantly different (homogenous groups) at *p* ≤ 0.05

**Table S3.** Physico-chemical parameters of smoothies before and after storage time (3 and 6 months).

| Sample   | 0 months (T0) |                |                         |          |               |                  | 3 months (T3) |                |                         |          |               |                  | 6 months (T6) |                |                         |          |               |                 |
|----------|---------------|----------------|-------------------------|----------|---------------|------------------|---------------|----------------|-------------------------|----------|---------------|------------------|---------------|----------------|-------------------------|----------|---------------|-----------------|
|          | Ash           | TSS            | TA                      | TSS/TA   | pH            | Vitamin C        | Ash           | TSS            | TA                      | TSS/TA   | pH            | Vitamin C        | Ash           | TSS            | TA                      | TSS/TA   | pH            | Vitamin C       |
|          | (g/100 g fw)  | (°Brix)        | (g of MA*<br>/100 g fw) |          |               |                  | (g/100 g fw)  | (°Brix)        | (g of MA*<br>/100 g fw) |          |               |                  | (g/100 g fw)  | (°Brix)        | (g of MA*<br>/100 g fw) |          |               |                 |
| Dk/Md    | 0.24 ± 0.01 d | 13.30 ± 0.03 f | 0.42 ± 0.01 cd          | 32.44 c  | 3.31 ± 0.03 l | 1.60 ± 0.37 d    | 0.26 ± 0.04 d | 13.00 ± 0.05 g | 0.42 ± 0.01 cd          | 31.33 de | 3.67 ± 0.00 g | 1.54 ± 0.01 d    | 0.25 ± 0.01 d | 12.80 ± 0.01 h | 0.42 ± 0.01 cd          | 30.84 e  | 3.57 ± 0.00 i | 1.32 ± 0.02 def |
| Dk/Md+Cs | 0.33 ± 0.00 c | 13.70 ± 0.00 e | 0.39 ± 0.01 e           | 36.05 a  | 3.74 ± 0.01 e | 1.43 ± 0.02 de   | 0.32 ± 0.03 c | 13.30 ± 0.02 f | 0.51 ± 0.02 a           | 26.34 g  | 3.66 ± 0.00 g | 1.10 ± 0.24 defg | 0.34 ± 0.01 c | 13.10 ± 0.03 g | 0.50 ± 0.01 ab          | 26.20 g  | 3.45 ± 0.00 j | 0.80 ± 0.01 gh  |
| Dk/Md+Mc | 0.35 ± 0.00 c | 13.90 ± 0.05 d | 0.41 ± 0.01 de          | 34.75 b  | 3.84 ± 0.03 d | 1.13 ± 0.07 defg | 0.34 ± 0.03 c | 13.70 ± 0.04 e | 0.48 ± 0.02 b           | 28.84 f  | 3.70 ± 0.00 f | 1.04 ± 0.21 efg  | 0.35 ± 0.01 c | 13.60 ± 0.01 e | 0.48 ± 0.01 b           | 28.33 f  | 3.62 ± 0.00 h | 0.49 ± 0.08 hi  |
| Dk/Md+As | 0.52 ± 0.06 a | 15.40 ± 0.00 b | 0.44 ± 0.01 c           | 35.81 a  | 4.10 ± 0.00 a | 1.25 ± 0.24 defg | 0.53 ± 0.01 a | 15.10 ± 0.12 c | 0.49 ± 0.02 ab          | 31.13 de | 3.99 ± 0.01 b | 0.96 ± 0.23 fg   | 0.53 ± 0.02 a | 15.00 ± 0.25 c | 0.49 ± 0.01 ab          | 30.93 de | 3.87 ± 0.01 c | 0.37 ± 0.05 i   |
| Dk/Md+Au | 0.42 ± 0.02 b | 15.60 ± 0.02 a | 0.49 ± 0.01 ab          | 31.84 cd | 3.63 ± 0.01 h | 23.59 ± 0.60 a   | 0.41 ± 0.06 b | 15.40 ± 0.00 b | 0.49 ± 0.00 ab          | 31.43 de | 3.47 ± 0.00 j | 19.01 ± 0.05 b   | 0.42 ± 0.04 b | 15.30 ± 0.15 b | 0.50 ± 0.01 ab          | 30.91 de | 3.37 ± 0.00 k | 17.26 ± 0.34 c  |

MA\* : malic acid; Data are given as mean ± standard deviation (n = 3). Mean values within columns presenting the same characteristics/properties immediately after processing, after 3 months, and after 6 months of storage with different letters (a-l) are significantly different (homogenous groups) at  $p \leq 0.05$ .

**Table S4.** Spearman correlation coefficients and significance level for T0 smoothies (see legend at the bottom of the table).

(a)

|                                        | Colour  | Aroma   | Taste   | Consistency | Desirability | TP <sup>1</sup> (Folin-Ciocalteus' assay) | CUPRAC  | FRAP    | ORAC    | DPPH·   | ABTS <sup>++</sup> | $\alpha$ -amylase | $\alpha$ -glucosidase | pancreatic lipase | Total anthocyanins | Total hydroxybenzoic acids |
|----------------------------------------|---------|---------|---------|-------------|--------------|-------------------------------------------|---------|---------|---------|---------|--------------------|-------------------|-----------------------|-------------------|--------------------|----------------------------|
| <b>Aroma</b>                           | 0.8975  |         |         |             |              |                                           |         |         |         |         |                    |                   |                       |                   |                    |                            |
| <b>Taste</b>                           | 0.7348  | 0.7579  |         |             |              |                                           |         |         |         |         |                    |                   |                       |                   |                    |                            |
| <b>Consistency</b>                     | 0.8630  | 0.5724  | 0.4344  |             |              |                                           |         |         |         |         |                    |                   |                       |                   |                    |                            |
| <b>Desirability</b>                    | 0.8255  | 0.7632  | 0.8653  | 0.6910      |              |                                           |         |         |         |         |                    |                   |                       |                   |                    |                            |
| <b>TP<sup>1</sup></b>                  | 0.2094  | 0.6155  | 0.2944  | -0.2528     | 0.1565       |                                           |         |         |         |         |                    |                   |                       |                   |                    |                            |
| <b>CUPRAC</b>                          | -0.6800 | -0.4260 | -0.2458 | -0.7352     | -0.2195      | 0.2065                                    |         |         |         |         |                    |                   |                       |                   |                    |                            |
| <b>FRAP</b>                            | 0.3119  | 0.5238  | -0.0621 | 0.0518      | -0.1369      | 0.6982                                    | -0.3746 |         |         |         |                    |                   |                       |                   |                    |                            |
| <b>ORAC</b>                            | -0.0799 | 0.3558  | 0.1280  | -0.5399     | -0.1275      | 0.9396                                    | 0.3232  | 0.6368  |         |         |                    |                   |                       |                   |                    |                            |
| <b>DPPH·</b>                           | 0.1686  | 0.4660  | -0.0966 | -0.1407     | -0.1898      | 0.8133                                    | -0.1478 | 0.9714  | 0.7814  |         |                    |                   |                       |                   |                    |                            |
| <b>ABTS<sup>++</sup></b>               | 0.2707  | 0.4596  | -0.1254 | 0.0410      | -0.2077      | 0.6362                                    | -0.4093 | 0.9954  | 0.5941  | 0.9564  |                    |                   |                       |                   |                    |                            |
| <b><math>\alpha</math>-amylase</b>     | -0.8381 | -0.6853 | -0.8904 | -0.7502     | -0.9545      | 0.0386                                    | 0.3994  | 0.2213  | 0.2833  | 0.3212  | 0.2722             |                   |                       |                   |                    |                            |
| <b><math>\alpha</math>-glucosidase</b> | -0.6916 | -0.7003 | -0.8513 | -0.5186     | -0.9732      | -0.2389                                   | -0.0060 | 0.2080  | 0.0193  | 0.2066  | 0.2896             | 0.8864            |                       |                   |                    |                            |
| <b>pancreatic lipase</b>               | -0.0543 | 0.2684  | 0.2354  | -0.3045     | 0.3342       | 0.6321                                    | 0.7490  | -0.0178 | 0.5411  | 0.1746  | -0.1012            | -0.0699           | -0.5218               |                   |                    |                            |
| <b>Total anthocyanins</b>              | 0.5698  | 0.4382  | -0.0570 | 0.7347      | 0.3702       | 0.0188                                    | -0.3966 | 0.3508  | -0.2710 | 0.2425  | 0.3352             | -0.2604           | -0.2584               | 0.0100            |                    |                            |
| <b>Total hydroxybenzoic acids</b>      | -0.2302 | -0.2484 | -0.4194 | -0.2343     | -0.7006      | -0.0540                                   | -0.4658 | 0.4872  | 0.1478  | 0.4058  | 0.5618             | 0.5368            | 0.8093                | -0.7219           | -0.2513            |                            |
| <b>Total hydroxycinnamic acids</b>     | 0.2640  | 0.3745  | 0.2335  | 0.2272      | 0.5879       | 0.3190                                    | 0.4385  | -0.0994 | 0.0763  | -0.0090 | -0.1772            | -0.3397           | -0.6864               | 0.8115            | 0.5164             | -0.8939                    |
| <b>Total dihydrochalcones</b>          | -0.3844 | -0.1656 | -0.1600 | -0.4030     | 0.0603       | 0.2677                                    | 0.8970  | -0.2763 | 0.2346  | -0.0799 | -0.3315            | 0.1891            | -0.2573               | 0.8758            | 0.0295             | -0.7123                    |
| <b>Total flavan-3-ols</b>              | 0.5677  | 0.4759  | -0.1074 | 0.6766      | 0.2445       | 0.1285                                    | -0.5013 | 0.5593  | -0.1304 | 0.4410  | 0.5530             | -0.1493           | -0.1126               | -0.0870           | 0.9675             | -0.0292                    |
| <b>Polymeric proanthocyanidins</b>     | -0.0145 | -0.0069 | 0.0145  | -0.1723     | -0.4061      | 0.0549                                    | -0.5232 | 0.4024  | 0.2402  | 0.3202  | 0.4550             | 0.2042            | 0.5062                | -0.6517           | -0.4569            | 0.8890                     |
| <b>Total flavonols</b>                 | 0.1435  | -0.1958 | -0.1592 | 0.5803      | 0.2831       | -0.6962                                   | -0.0922 | -0.5318 | -0.8639 | -0.6223 | -0.5225            | -0.2892           | -0.2235               | -0.1351           | 0.5832             | -0.4858                    |

|                                       |         |         |         |         |         |         |         |         |         |         |         |         |         |         |         |         |
|---------------------------------------|---------|---------|---------|---------|---------|---------|---------|---------|---------|---------|---------|---------|---------|---------|---------|---------|
| <b>Total polyphenols (UPLC-PDA)</b>   | 0.1108  | 0.0271  | -0.1286 | 0.0722  | -0.4063 | -0.0579 | -0.7279 | 0.5168  | 0.0590  | 0.3764  | 0.5812  | 0.2073  | 0.5665  | -0.8028 | -0.1228 | 0.9348  |
| <b>Ash</b>                            | -0.2988 | -0.4697 | -0.6411 | -0.0723 | -0.7374 | -0.4139 | -0.4816 | 0.2612  | -0.2431 | 0.1437  | 0.3529  | 0.5604  | 0.8718  | -0.8522 | -0.0374 | 0.8963  |
| <b>TSS<sup>2</sup></b>                | -0.0692 | -0.1865 | -0.2652 | -0.0320 | -0.5414 | -0.2149 | -0.6381 | 0.3668  | -0.0462 | 0.2364  | 0.4440  | 0.3206  | 0.6883  | -0.8619 | -0.2230 | 0.9617  |
| <b>TA<sup>3</sup></b>                 | 0.2159  | 0.2677  | 0.2177  | -0.0382 | -0.1929 | 0.2505  | -0.5950 | 0.5438  | 0.3623  | 0.4565  | 0.5754  | 0.0269  | 0.2998  | -0.5283 | -0.3346 | 0.7875  |
| <b>TSS<sup>2</sup>/TA<sup>3</sup></b> | -0.4766 | -0.7191 | -0.7355 | 0.0141  | -0.3884 | -0.7181 | 0.1989  | -0.4614 | -0.6866 | -0.4802 | -0.4140 | 0.3860  | 0.3949  | -0.2179 | 0.2808  | -0.0957 |
| <b>pH</b>                             | -0.2827 | -0.5420 | -0.7874 | 0.1312  | -0.6036 | -0.6038 | -0.3519 | 0.0670  | -0.5377 | -0.0509 | 0.1491  | 0.5021  | 0.7289  | -0.6997 | 0.3330  | 0.5356  |
| <b>Vitamin C</b>                      | 0.4654  | 0.3959  | 0.5631  | 0.2496  | 0.1924  | 0.0459  | -0.6878 | 0.2233  | 0.0815  | 0.0972  | 0.2398  | -0.4055 | -0.0689 | -0.5351 | -0.3158 | 0.4933  |

(b)

|                                       | Total<br>hydroxycinnamic acids | Total dihydrochalcones | Total flavan-3-ols | Polymeric<br>proanthocyanidins | Total flavonols | Total polyphenols (UPLC-PDA) | Ash    | TSS <sup>2</sup> | TA <sup>3</sup> | TSS <sup>2</sup> /TA <sup>3</sup> | pH      |
|---------------------------------------|--------------------------------|------------------------|--------------------|--------------------------------|-----------------|------------------------------|--------|------------------|-----------------|-----------------------------------|---------|
| <b>Total dihydrochalcones</b>         | 0.7771                         |                        |                    |                                |                 |                              |        |                  |                 |                                   |         |
| <b>Total flavan-3-ols</b>             | 0.3548                         | -0.1147                |                    |                                |                 |                              |        |                  |                 |                                   |         |
| <b>Polymeric proanthocyanidins</b>    | -0.9119                        | -0.8137                | -0.2465            |                                |                 |                              |        |                  |                 |                                   |         |
| <b>Total flavonols</b>                | 0.4015                         | 0.1695                 | 0.3968             | -0.6600                        |                 |                              |        |                  |                 |                                   |         |
| <b>Total polyphenols (UPLC-PDA)</b>   | -0.8679                        | -0.9020                | 0.0920             | 0.9281                         | -0.4266         |                              |        |                  |                 |                                   |         |
| <b>Ash</b>                            | -0.8114                        | -0.6525                | 0.1192             | 0.6533                         | -0.0609         | 0.8109                       |        |                  |                 |                                   |         |
| <b>TSS<sup>2</sup></b>                | -0.9403                        | -0.8669                | -0.0253            | 0.9155                         | -0.3613         | 0.9761                       | 0.8915 |                  |                 |                                   |         |
| <b>TA<sup>3</sup></b>                 | -0.7685                        | -0.8084                | -0.1190            | 0.9609                         | -0.7157         | 0.8929                       | 0.4889 | 0.8212           |                 |                                   |         |
| <b>TSS<sup>2</sup>/TA<sup>3</sup></b> | 0.0914                         | 0.2645                 | 0.1676             | -0.4600                        | 0.7624          | -0.2635                      | 0.3299 | -0.1058          | -0.6544         |                                   |         |
| <b>pH</b>                             | -0.4152                        | -0.3436                | 0.3871             | 0.1564                         | 0.4279          | 0.4333                       | 0.8455 | 0.5354           | -0.0159         | 0.7358                            |         |
| <b>Vitamin C</b>                      | -0.6442                        | -0.8478                | -0.1886            | 0.8104                         | -0.4718         | 0.7208                       | 0.2451 | 0.6434           | 0.8793          | -0.6827                           | -0.1958 |

Legend

|                  |                                          |  |                              |
|------------------|------------------------------------------|--|------------------------------|
| TP <sup>1</sup>  | Total phenols by Folin-Ciocalteu's assay |  | significant at $p \leq 0.05$ |
| TSS <sup>2</sup> | Total soluble solids                     |  | significant at $p \leq 0.01$ |
| TA <sup>3</sup>  | Total acidity                            |  |                              |

**Table S5.** Spearman correlation coefficients and significance level for T3 smoothies (see legend at the bottom of the table).

(a)

|                                   | TP <sup>1</sup> (Folin-Ciocalteus' assay) | CUPRAC  | FRAP    | ORAC    | DPPH <sup>•</sup> | ABTS <sup>•+</sup> | $\alpha$ -amylase | $\alpha$ -glucosidase | pancreatic lipase | Total anthocyanins | Total hydroxybenzoic acids | Total hydroxycinnamic acids | Total dihydrochalcones | Total flavan-3-ols | Polymeric proanthocyanidins | Total flavonols | Total polyphenols (UPLC-PDA) |
|-----------------------------------|-------------------------------------------|---------|---------|---------|-------------------|--------------------|-------------------|-----------------------|-------------------|--------------------|----------------------------|-----------------------------|------------------------|--------------------|-----------------------------|-----------------|------------------------------|
| CUPRAC                            | 0.9882                                    |         |         |         |                   |                    |                   |                       |                   |                    |                            |                             |                        |                    |                             |                 |                              |
| FRAP                              | 0.9410                                    | 0.9581  |         |         |                   |                    |                   |                       |                   |                    |                            |                             |                        |                    |                             |                 |                              |
| ORAC                              | 0.6397                                    | 0.5308  | 0.5652  |         |                   |                    |                   |                       |                   |                    |                            |                             |                        |                    |                             |                 |                              |
| DPPH <sup>•</sup>                 | 0.8905                                    | 0.9115  | 0.9901  | 0.5412  |                   |                    |                   |                       |                   |                    |                            |                             |                        |                    |                             |                 |                              |
| ABTS <sup>•+</sup>                | 0.9303                                    | 0.9459  | 0.9987  | 0.5843  | 0.9920            |                    |                   |                       |                   |                    |                            |                             |                        |                    |                             |                 |                              |
| $\alpha$ -amylase                 | 0.4505                                    | 0.4655  | 0.6791  | 0.3594  | 0.7736            | 0.6930             |                   |                       |                   |                    |                            |                             |                        |                    |                             |                 |                              |
| $\alpha$ -glucosidase             | -0.0576                                   | -0.0116 | 0.2548  | -0.0443 | 0.3873            | 0.2762             | 0.8538            |                       |                   |                    |                            |                             |                        |                    |                             |                 |                              |
| pancreatic lipase                 | 0.1925                                    | 0.0877  | 0.0482  | 0.7346  | -0.0173           | 0.0740             | -0.2756           | -0.4718               |                   |                    |                            |                             |                        |                    |                             |                 |                              |
| Total anthocyanins                | 0.4329                                    | 0.4924  | 0.2668  | -0.2851 | 0.1735            | 0.2223             | -0.3039           | -0.5229               | -0.3212           |                    |                            |                             |                        |                    |                             |                 |                              |
| Total hydroxybenzoic acids        | 0.6143                                    | 0.5252  | 0.5654  | 0.9611  | 0.5330            | 0.5911             | 0.2820            | -0.0828               | 0.8208            | -0.2949            |                            |                             |                        |                    |                             |                 |                              |
| Total hydroxycinnamic acids       | -0.4764                                   | -0.3606 | -0.3405 | -0.9314 | -0.2853           | -0.3615            | -0.0195           | 0.3235                | -0.9270           | 0.2675             | -0.9502                    |                             |                        |                    |                             |                 |                              |
| Total dihydrochalcones            | -0.5987                                   | -0.4921 | -0.3803 | -0.8490 | -0.2881           | -0.3849            | 0.1389            | 0.5602                | -0.8526           | -0.0714            | -0.8514                    | 0.9382                      |                        |                    |                             |                 |                              |
| Total flavan-3-ols                | 0.6953                                    | 0.7369  | 0.5327  | 0.0431  | 0.4273            | 0.4984             | -0.1732           | -0.5259               | -0.0440           | 0.9256             | 0.0720                     | -0.0537                     | -0.3577                |                    |                             |                 |                              |
| Polymeric proanthocyanidins       | 0.3673                                    | 0.2576  | 0.3280  | 0.9291  | 0.3145            | 0.3610             | 0.2178            | -0.0399               | 0.8720            | -0.5293            | 0.9543                     | -0.9493                     | -0.7844                | -0.2023            |                             |                 |                              |
| Total flavonols                   | 0.0277                                    | 0.0163  | -0.1538 | -0.3105 | -0.1844           | -0.2003            | -0.1974           | -0.2883               | -0.5037           | 0.5989             | -0.5206                    | 0.3863                      | 0.1361                 | 0.3500             | -0.5629                     |                 |                              |
| Total polyphenols (UPLC-PDA)      | 0.5520                                    | 0.4376  | 0.4404  | 0.9753  | 0.3973            | 0.4612             | 0.1610            | -0.2121               | 0.8643            | -0.2806            | 0.9721                     | -0.9888                     | -0.9166                | 0.0500             | 0.9580                      | -0.3669         |                              |
| Ash                               | 0.7920                                    | 0.7476  | 0.8613  | 0.8031  | 0.8874            | 0.8735             | 0.8123            | 0.4169                | 0.2204            | -0.1640            | 0.7319                     | -0.5448                     | -0.4607                | 0.1163             | 0.6175                      | -0.2134         | 0.6609                       |
| TSS <sup>2</sup>                  | 0.7285                                    | 0.6456  | 0.6984  | 0.9760  | 0.6771            | 0.7192             | 0.4467            | 0.0333                | 0.6837            | -0.2335            | 0.9756                     | -0.8880                     | -0.8037                | 0.1258             | 0.8992                      | -0.4152         | 0.9402                       |
| TA <sup>3</sup>                   | 0.4553                                    | 0.3461  | 0.2701  | 0.5661  | 0.2478            | 0.2506             | 0.2135            | -0.1503               | 0.1428            | 0.1167             | 0.3287                     | -0.4157                     | -0.5094                | 0.1554             | 0.3120                      | 0.5849          | 0.4798                       |
| TSS <sup>2</sup> /TA <sup>3</sup> | 0.2425                                    | 0.2717  | 0.4051  | 0.3643  | 0.4129            | 0.4437             | 0.2542            | 0.2221                | 0.4718            | -0.3489            | 0.5863                     | -0.4108                     | -0.2335                | -0.0537            | 0.5327                      | -0.9491         | 0.4042                       |
| pH                                | 0.3762                                    | 0.4500  | 0.6120  | -0.0517 | 0.6993            | 0.6087             | 0.8834            | 0.8140                | -0.6572           | 0.0400             | -0.1215                    | 0.3934                      | 0.4468                 | 0.0448             | -0.2445                     | 0.0485          | -0.2582                      |

|           |        |        |        |        |         |        |         |         |        |         |        |         |         |         |        |         |        |
|-----------|--------|--------|--------|--------|---------|--------|---------|---------|--------|---------|--------|---------|---------|---------|--------|---------|--------|
| Vitamin C | 0.1628 | 0.0533 | 0.0032 | 0.7188 | -0.0648 | 0.0272 | -0.3156 | -0.5059 | 0.9979 | -0.3123 | 0.7947 | -0.9194 | -0.8536 | -0.0512 | 0.8552 | -0.4570 | 0.8529 |
|-----------|--------|--------|--------|--------|---------|--------|---------|---------|--------|---------|--------|---------|---------|---------|--------|---------|--------|

(b)

|                                   | Ash    | TSS <sup>2</sup> | TA <sup>3</sup> | TSS <sup>2</sup> /TA <sup>3</sup> | pH      |
|-----------------------------------|--------|------------------|-----------------|-----------------------------------|---------|
| TSS <sup>2</sup>                  | 0.8596 |                  |                 |                                   |         |
| TA <sup>3</sup>                   | 0.5038 | 0.4383           |                 |                                   |         |
| TSS <sup>2</sup> /TA <sup>3</sup> | 0.3399 | 0.5116           | -0.5468         |                                   |         |
| pH                                | 0.5511 | 0.0692           | 0.0462          | 0.0625                            |         |
| Vitamin C                         | 0.1852 | 0.6551           | 0.1717          | 0.4163                            | -0.6935 |

Legend

|                  |                                          |                              |
|------------------|------------------------------------------|------------------------------|
| TP <sup>1</sup>  | Total phenols by Folin-Ciocalteu's assay | significant at $p \leq 0.05$ |
| TSS <sup>2</sup> | Total soluble solids                     | significant at $p \leq 0.01$ |
| TA <sup>3</sup>  | Total acidity                            |                              |

**Table S6.** Spearman correlation coefficients and significance level for T6 smoothies (see legend at the bottom of the table).

(a)

|                                   | TP <sup>1</sup> (Folin-Ciocalteus) <sup>1</sup> as-CUPRAC | CUPRAC  | FRAP    | ORAC    | DPPH <sup>•</sup> | ABTS <sup>•+</sup> | $\alpha$ -amylase | $\alpha$ -glucosidase | pancreatic lipase | Total anthocyanins | Total hydroxybenzoic | Total hydroxycinnamic | Total dihydro-chalcones | Total flavan-3-ols | Polymeric proanthocya- | Total flavonols | Total polyphenols (UPLC-nols (UPLC- |
|-----------------------------------|-----------------------------------------------------------|---------|---------|---------|-------------------|--------------------|-------------------|-----------------------|-------------------|--------------------|----------------------|-----------------------|-------------------------|--------------------|------------------------|-----------------|-------------------------------------|
| CUPRAC                            | 0.9710                                                    |         |         |         |                   |                    |                   |                       |                   |                    |                      |                       |                         |                    |                        |                 |                                     |
| FRAP                              | 0.9787                                                    | 0.9036  |         |         |                   |                    |                   |                       |                   |                    |                      |                       |                         |                    |                        |                 |                                     |
| ORAC                              | 0.4654                                                    | 0.3271  | 0.6020  |         |                   |                    |                   |                       |                   |                    |                      |                       |                         |                    |                        |                 |                                     |
| DPPH <sup>•</sup>                 | 0.9313                                                    | 0.8218  | 0.9841  | 0.6610  |                   |                    |                   |                       |                   |                    |                      |                       |                         |                    |                        |                 |                                     |
| ABTS <sup>•+</sup>                | 0.9892                                                    | 0.9277  | 0.9964  | 0.5546  | 0.9668            |                    |                   |                       |                   |                    |                      |                       |                         |                    |                        |                 |                                     |
| $\alpha$ -amylase                 | 0.5286                                                    | 0.3305  | 0.6898  | 0.9084  | 0.7823            | 0.6387             |                   |                       |                   |                    |                      |                       |                         |                    |                        |                 |                                     |
| $\alpha$ -glucosidase             | -0.4964                                                   | -0.6563 | -0.3255 | 0.4038  | -0.2177           | -0.3676            | 0.4194            |                       |                   |                    |                      |                       |                         |                    |                        |                 |                                     |
| pancreatic lipase                 | 0.7003                                                    | 0.5243  | 0.8286  | 0.8205  | 0.9102            | 0.7813             | 0.9518            | 0.1430                |                   |                    |                      |                       |                         |                    |                        |                 |                                     |
| Total anthocyanins                | 0.4947                                                    | 0.6661  | 0.3175  | -0.3858 | 0.1984            | 0.3634             | -0.4355           | -0.9955               | -0.1727           |                    |                      |                       |                         |                    |                        |                 |                                     |
| Total hydroxybenzoic acids        | 0.4220                                                    | 0.2825  | 0.4946  | 0.3263  | 0.4936            | 0.5117             | 0.5389            | 0.3225                | 0.4584            | -0.3234            |                      |                       |                         |                    |                        |                 |                                     |
| Total hydroxycinnamic acids       | 0.2955                                                    | 0.5107  | 0.1187  | -0.2252 | -0.0273           | 0.1661             | -0.4925           | -0.7916               | -0.3478           | 0.8421             | -0.4675              |                       |                         |                    |                        |                 |                                     |
| Total dihydrochalcones            | -0.5187                                                   | -0.4867 | -0.5031 | -0.1972 | -0.4171           | -0.5524            | -0.2687           | -0.0147               | -0.2182           | -0.0195            | -0.8746              | 0.0023                |                         |                    |                        |                 |                                     |
| Total flavan-3-ols                | 0.7084                                                    | 0.8177  | 0.5645  | -0.2435 | 0.4647            | 0.6056             | -0.1860           | -0.9528               | 0.0935            | 0.9421             | -0.0452              | 0.6627                | -0.2085                 |                    |                        |                 |                                     |
| Polymeric proanthocyanidins       | -0.1983                                                   | -0.2694 | -0.1758 | -0.3192 | -0.1837           | -0.1403            | -0.0783           | 0.3660                | -0.1960           | -0.3748            | 0.7250               | -0.5171               | -0.6104                 | -0.2380            |                        |                 |                                     |
| Total flavonols                   | 0.1379                                                    | 0.3353  | 0.0040  | -0.0109 | -0.1166           | 0.0325             | -0.3805           | -0.5355               | -0.3189           | 0.6006             | -0.5744              | 0.9269                | 0.1406                  | 0.3707             | -0.6625                |                 |                                     |
| Total polyphenols (UPLC-PDA)      | 0.2521                                                    | 0.2442  | 0.2054  | -0.2315 | 0.1210            | 0.2670             | -0.0630           | -0.0397               | -0.0927           | 0.0542             | 0.7966               | -0.0821               | -0.8914                 | 0.2112             | 0.8416                 | -0.3102         |                                     |
| Ash                               | 0.7686                                                    | 0.6402  | 0.8548  | 0.8219  | 0.8583            | 0.8443             | 0.8584            | 0.1585                | 0.8331            | -0.1436            | 0.7230               | -0.1576               | -0.6688                 | 0.1072             | 0.0531                 | -0.1382         | 0.3078                              |
| TSS <sup>2</sup>                  | 0.6038                                                    | 0.4730  | 0.6710  | 0.4833  | 0.6589            | 0.6855             | 0.6449            | 0.2204                | 0.5920            | -0.2136            | 0.9692               | -0.3285               | -0.8925                 | 0.0700             | 0.5415                 | -0.4194         | 0.7165                              |
| TA <sup>3</sup>                   | 0.4888                                                    | 0.5266  | 0.4585  | 0.4744  | 0.3476            | 0.4963             | 0.2639            | -0.0119               | 0.1765            | 0.0887             | 0.4642               | 0.3800                | -0.7539                 | 0.1263             | 0.0597                 | 0.4307          | 0.4424                              |
| TSS <sup>2</sup> /TA <sup>3</sup> | 0.1509                                                    | -0.0460 | 0.2684  | 0.0801  | 0.3761            | 0.2430             | 0.4827            | 0.3177                | 0.4986            | -0.3897            | 0.6339               | -0.8114               | -0.2283                 | -0.1044            | 0.5697                 | -0.9524         | 0.3482                              |
| pH                                | 0.6363                                                    | 0.5239  | 0.7181  | 0.6159  | 0.8018            | 0.6632             | 0.7094            | -0.1715               | 0.8632            | 0.1268             | -0.0091              | -0.0983               | 0.2043                  | 0.2993             | -0.5676                | -0.0889         | -0.4551                             |
| Vitamin C                         | -0.0975                                                   | -0.1423 | -0.0922 | -0.2109 | -0.1356           | -0.0458            | -0.0573           | 0.3373                | -0.1978           | -0.3213            | 0.7759               | -0.3550               | -0.7657                 | -0.2018            | 0.9599                 | -0.4738         | 0.9111                              |



(b)

|                                   | Ash    | TSS <sup>2</sup> | TA <sup>3</sup> | TSS <sup>2</sup> /TA <sup>3</sup> | pH      |
|-----------------------------------|--------|------------------|-----------------|-----------------------------------|---------|
| TSS <sup>2</sup>                  | 0.8620 |                  |                 |                                   |         |
| TA <sup>3</sup>                   | 0.6649 | 0.5932           |                 |                                   |         |
| TSS <sup>2</sup> /TA <sup>3</sup> | 0.2970 | 0.5297           | -0.3672         |                                   |         |
| pH                                | 0.5053 | 0.1495           | -0.1303         | 0.2986                            |         |
| Vitamin C                         | 0.1842 | 0.6328           | 0.3295          | 0.3912                            | -0.6238 |

Legend

|                  |                                          |                              |
|------------------|------------------------------------------|------------------------------|
| TP <sup>1</sup>  | Total phenols by Folin-Ciocalteu's assay | significant at $p \leq 0.05$ |
| TSS <sup>2</sup> | Total soluble solids                     | significant at $p \leq 0.01$ |
| TA <sup>3</sup>  | Total acidity                            |                              |

**Table S7.** Qualitative profile of phenolic compounds by LC-PDA/MS QToF method

| Code                 | Compound                                     | R <sub>t</sub><br>(min) | λ <sub>max</sub><br>(nm) | MS* [M-H] <sup>-</sup> ( <i>m/z</i> ) | MS/MS [M-H] <sup>-</sup> ( <i>m/z</i> ) |
|----------------------|----------------------------------------------|-------------------------|--------------------------|---------------------------------------|-----------------------------------------|
| Anthocyanins         |                                              |                         |                          |                                       |                                         |
| A1                   | Delphinidin-3,5- <i>O</i> -diglucoside       | 3.040                   | 518                      | 627.2785 <sup>+</sup>                 | 465.1909/303.1100                       |
| A2                   | Delphinidin-3- <i>O</i> -glucoside           | 3.856                   | 515                      | 465.1953 <sup>+</sup>                 | 303.1100                                |
| A3                   | Delphinidin-pentose                          | 4.133                   | 520                      | 435.1818 <sup>+</sup>                 | 303.1100                                |
| A4                   | Cyanidin-3- <i>O</i> -galactoside            | 4.135                   | 515                      | 449.1959 <sup>+</sup>                 | 287.1116                                |
| A5                   | Cyanidin-3- <i>O</i> -glucoside              | 4.397                   | 520                      | 449.1959 <sup>+</sup>                 | 287.1116                                |
| A6                   | Cyanidin-3- <i>O</i> -arabinoside            | 4.629                   | 515                      | 419.1797 <sup>+</sup>                 | 287.1116                                |
| A7                   | Petunidin-3- <i>O</i> -glucoside             | 4.648                   | 525                      | 479.2150 <sup>+</sup>                 | 317.1295                                |
| A8                   | Peonidin-3- <i>O</i> -glucoside              | 5.156                   | 525                      | 463.2164 <sup>+</sup>                 | 301.1330                                |
| A9                   | Malvidin-3- <i>O</i> -glucoside              | 5.391                   | 519                      | 493.2339 <sup>+</sup>                 | 331.1495                                |
| Hydroxybenzoic acids |                                              |                         |                          |                                       |                                         |
| B1                   | Gallic acid glucoside I                      | 1.156                   | 280                      | 331.1266                              | 271.1605/169.1417                       |
| B2                   | Galloyl glucoside I                          | 1.274                   | 277                      | 331.1334                              | 169.0417                                |
| B3                   | Galloyl HHDP-glucose I                       | 1.325                   | 271                      | 633,1283                              | 481.0828/301.0667                       |
| B4                   | Galloyl glucoside II                         | 1.331                   | 270                      | 331,0639                              | 169.0117                                |
| B5                   | Gallic acid glucoside II                     | 1.366                   | 270                      | 331.1334                              | 271.1990/169.1417                       |
| B6                   | 3- <i>O</i> -Galloylquinic acid (Theogallin) | 1.551                   | 273                      | 343.0742                              | 191.1410                                |
| B7                   | Galloyl HHDP-glucose II                      | 1.591                   | 272                      | 633,1283                              | 481.0828/301.0667                       |
| B8                   | Galloyl glucoside III                        | 1.627                   | 273                      | 331,0639                              | 169.0117                                |
| B9                   | Gallic acid 4- <i>O</i> -β-D-glucopyranoside | 2.080                   | 320                      | 331.1334                              | 169.0417                                |
| B10                  | Castalagin                                   | 2.084                   | 280                      | 933.1019                              | 785.1813/481.0917/301.1057              |
| B11                  | Galloyl shikimic acid                        | 2.314                   | 272                      | 325.0878                              | 169.0417/125.4180                       |
| B12                  | Casuarin                                     | 2.420                   | 374                      | 783.1445                              | 481.0421/301.0667                       |
| B13                  | Digalloylquinic acid                         | 2.755                   | 273                      | 495.1837                              | 343.1255/191.3072                       |
| B14                  | Ellagitannin I                               | 2.829                   | 270                      | 933.1114                              | 781.0445/633.7131/301.1057              |
| B15                  | Ellagitannin II                              | 3.035                   | 275                      | 783.0645                              | 481.0186/301.1021                       |
| B16                  | Ellagitannin III                             | 3.331                   | 280                      | 783.0759                              | 481.0917/301.0667                       |
| B17                  | Nilocitin                                    | 3.653                   | 270                      | 481.0938                              | 301.0667/257.1438                       |
| B18                  | Digalloyl shikimic acid                      | 4.129                   | 278                      | 477.0493                              | 325.0808/169.0417                       |
| B19                  | Syringic acid                                | 4.181                   | 320                      | 197.0458                              | 179.1098/135.0354                       |
| B20                  | Casuarinin                                   | 4.391                   | 278                      | 935.0146                              | 765.1799/545.1230                       |
| B21                  | Salicylic acid                               | 5.037                   | 320                      | 136.1212                              |                                         |
| B22                  | Ellagic acid arabinoside                     | 5.703                   | 359                      | 433.0224                              | 301.0631                                |
| B23                  | Ellagic acid xyloside                        | 5.885                   | 361                      | 433.0735                              | 301.0631                                |
| B24                  | Ellagic acid                                 | 6.028                   | 366                      | 300.0631                              |                                         |

## Hydroxycinnamic acids

|    |                                 |       |     |          |                   |
|----|---------------------------------|-------|-----|----------|-------------------|
| C1 | Neochlorogenic acid             | 3.489 | 317 | 353.1287 | 191.3100/136.0212 |
| C2 | Chlorogenic acid                | 3.723 | 323 | 353.0838 | 191.0534          |
| C3 | Caffeic acid                    | 4.036 | 320 | 311.0807 | 179.1098          |
| C4 | <i>p</i> -Coumaric acid         | 4.463 | 323 | 163.0349 |                   |
| C5 | <i>p</i> -Coumaroyloquinic acid | 4.904 | 310 | 337.0912 | 163.1014          |

## Dihydrochalcones

|    |                                                |       |     |          |          |
|----|------------------------------------------------|-------|-----|----------|----------|
| D1 | Phloretin-2'- <i>O</i> -xyloglucoside          | 7.433 | 280 | 567.1703 | 273.0757 |
| D2 | Phloretin-2'- <i>O</i> -glucoside (Phloridzin) | 8.186 | 280 | 435.1332 | 273.0733 |

## Flavan-3-ols

|    |                 |       |     |          |                   |
|----|-----------------|-------|-----|----------|-------------------|
| E1 | Procyanidin B1  | 3.256 | 280 | 577.1293 | 289.0708          |
| E2 | (+)-Catechin    | 3.669 | 280 | 289.0673 | 245.0780          |
| E3 | (-)-Epicatechin | 4.143 | 280 | 289.0673 | 245.0780          |
| E4 | Procyanidin B2  | 4.631 | 280 | 577.1293 | 289.0708          |
| E5 | Procyanidin C1  | 4.956 | 280 | 866.1908 | 577.1188/289.0708 |

## Flavonols

|     |                                                            |       |     |          |                   |
|-----|------------------------------------------------------------|-------|-----|----------|-------------------|
| F1  | Kaempferol-3- <i>O</i> -sophoroside-7- <i>O</i> -glucoside | 3.546 | 346 | 771.0181 | 609.0240/285.1257 |
| F2  | Kaempferol-3,7- <i>O</i> -diglucoside                      | 4.636 | 345 | 609.0341 | 447.0543/285.1292 |
| F3  | Isorhamnetin-3,7- <i>O</i> -digalactoside                  | 4.747 | 350 | 639.0883 | 447.0327/315.0605 |
| F4  | Quercetin derivative I                                     | 4.766 | 359 | 633.0900 | 463.0633/301.0667 |
| F5  | Myricetin galactoside-gallate                              | 4.995 | 360 | 631.1107 | 479.1073/317.1114 |
| F6  | Quercetin-3,7- <i>O</i> -diglucoside                       | 5.356 | 352 | 625.1044 | 463.0333/301.0924 |
| F7  | Myricetin-3- <i>O</i> -galactoside                         | 5.460 | 356 | 479.0610 | 317.1114          |
| F8  | Myricetin-3- <i>O</i> -glucoside                           | 5.534 | 356 | 479.0162 | 317.1114          |
| F9  | Isorhametin-3,7- <i>O</i> -diglucoside                     | 5.709 | 343 | 639.1035 | 477.1314/315.0948 |
| F10 | Quercetin galloylhexose                                    | 5.816 | 360 | 615.1291 | 463.0950/301.1092 |
| F11 | Kaempferol-3- <i>O</i> -sophoroside                        | 5.978 | 358 | 609.0240 | 285.1226          |
| F12 | Myricetin-3- <i>O</i> -arabinoside                         | 6.027 | 364 | 449.0362 | 317.0678          |
| F13 | Isorhamnetin-3- <i>O</i> -sophoroside                      | 6.158 | 352 | 639.0983 | 315.0948          |
| F14 | Myricetin-3- <i>O</i> -rhamnoside                          | 6.239 | 347 | 463.0861 | 317.1114          |
| F15 | Quercetin-3- <i>O</i> -galactoside                         | 6.345 | 348 | 463.0861 | 301.0994          |
| F16 | Quercetin-3- <i>O</i> -glucoside                           | 6.494 | 350 | 463.1774 | 301.1447          |
| F17 | Kaempferol-3- <i>O</i> -galactoside                        | 6.640 | 347 | 447.0629 | 285.1326          |
| F18 | Isorhamnetin-3- <i>O</i> -rutinoside                       | 6.697 | 352 | 623.1223 | 315.0871          |
| F19 | Quercetin-3- <i>O</i> -arabinoside                         | 6.765 | 350 | 433.0160 | 301.1421          |
| F20 | Quercetin-pentoside                                        | 6.957 | 360 | 433.0565 | 301.0959          |
| F21 | Quercetin-3- <i>O</i> -xyloside                            | 7.063 | 350 | 433.0160 | 301.1421          |
| F22 | Quercetin-3- <i>O</i> -rhamnoside                          | 7.325 | 348 | 447.0148 | 301.1447          |
| F23 | Isorhamnetin-3- <i>O</i> -glucoside                        | 7.539 | 352 | 477.1314 | 315.0871          |
| F24 | Kaempferol-hexoside I                                      | 7.568 | 350 | 447.1543 | 285.1326          |

---

|     |                        |        |     |          |          |
|-----|------------------------|--------|-----|----------|----------|
| F25 | Myricetin              | 7.683  | 367 | 317.1114 |          |
| F26 | Kaempferol-hexoside II | 7.764  | 350 | 447.1543 | 285.1326 |
| F27 | Quercetin              | 8.774  | 360 | 301.1065 |          |
| F28 | Kaempferol             | 9.435  | 360 | 285.1706 |          |
| F29 | Apigenin               | 10.743 | 360 | 269.2073 |          |

---

\*  $[M+H]^+$  ( $m/z$ ) for anthocyanins were obtained in the positive ion mode.

**Table S8.** Quantification of phenolic compounds by UPLC-PDA method (mg/100 g fw) in smoothies immediately after processing (T0), after 3 (T3) and 6 months (T6) storage.

| Code                 | T0         |            |             |             |             | T3          |             |            |            |             | T6         |             |            |            |             |
|----------------------|------------|------------|-------------|-------------|-------------|-------------|-------------|------------|------------|-------------|------------|-------------|------------|------------|-------------|
|                      | Dk/Md      | Dk/Md+Cs   | Dk/Md+Mc    | Dk/Md+As    | Dk/Md+Au    | Dk/Md       | Dk/Md+Cs    | Dk/Md+Mc   | Dk/Md+As   | Dk/Md+Au    | Dk/Md      | Dk/Md+Cs    | Dk/Md+Mc   | Dk/Md+As   | Dk/Md+Au    |
| Anthocyanins         |            |            |             |             |             |             |             |            |            |             |            |             |            |            |             |
| A1                   | nd         | 1.76±0.16a | nd          | nd          | nd          | nd          | 0.57±0.06b  | nd         | nd         | nd          | nd         | 0.18±0.01c  | nd         | nd         | nd          |
| A2                   | nd         | 0.57±0.11d | 8.42±0.22a  | nd          | nd          | nd          | 0.38±0.02e  | 2.98±0.11b | nd         | nd          | nd         | 0.47±0.02de | 2.01±0.10c | nd         | nd          |
| A3                   | nd         | nd         | 0.31±0.03a  | nd          | nd          | nd          | nd          | nd         | nd         | nd          | nd         | nd          | nd         | nd         | nd          |
| A4                   | nd         | nd         | nd          | nd          | 0.41±0.01a  | nd          | nd          | nd         | nd         | 0.05±0.00b  | nd         | nd          | nd         | nd         | nd          |
| A5                   | nd         | nd         | 2.21±0.12b  | 2.84±0.10a  | nd          | nd          | nd          | 0.67±0.04c | 0.44±0.03d | nd          | nd         | nd          | 0.67±0.05c | 0.24±0.02e | nd          |
| A6                   | nd         | nd         | nd          | nd          | 0.07±0.00a  | nd          | nd          | nd         | nd         | nd          | nd         | nd          | nd         | nd         | nd          |
| A7                   | nd         | nd         | 0.61±0.01a  | nd          | nd          | nd          | nd          | 0.23±0.02b | nd         | nd          | nd         | nd          | 0.16±0.01c | nd         | nd          |
| A8                   | nd         | nd         | 0.03±0.00a  | nd          | nd          | nd          | nd          | 0.01±0.00b | nd         | nd          | nd         | nd          | nd         | nd         | nd          |
| A9                   | nd         | nd         | 10.96±0.32a | nd          | nd          | nd          | nd          | 3.60±0.12b | nd         | nd          | nd         | nd          | 2.64±0.11c | nd         | nd          |
| Total                | nd         | 2.30±0.12e | 22.54±0.11a | 2.84±0.10d  | 0.48±0.01h  | nd          | 0.95±0.05f  | 7.49±0.10b | 0.44±0.03h | 0.05±0.00j  | nd         | 0.65±0.02g  | 5.49±0.11c | 0.24±0.02i | nd          |
| Hydroxybenzoic acids |            |            |             |             |             |             |             |            |            |             |            |             |            |            |             |
| B1                   | nd         | nd         | nd          | nd          | 1.09±0.02a  | nd          | nd          | nd         | nd         | 1.05±0.11a  | nd         | nd          | nd         | nd         | 0.90±0.06b  |
| B2                   | nd         | nd         | nd          | nd          | 2.19±0.03a  | nd          | nd          | nd         | nd         | 2.10±0.22a  | nd         | nd          | nd         | nd         | 1.80±0.20b  |
| B3                   | nd         | nd         | 7.33±0.12a  | nd          | nd          | nd          | nd          | 6.41±0.22b | nd         | nd          | nd         | nd          | 6.05±0.20c | nd         | nd          |
| B4                   | 5.15±0.03d | 5.06±0.02d | nd          | 10.06±0.36a | nd          | 4.14±0.22fg | 4.26±0.11ef | nd         | 7.77±0.32c | nd          | 4.48±0.20e | 3.90±0.24g  | nd         | 8.90±0.34b | nd          |
| B5                   | nd         | nd         | nd          | nd          | 2.18±0.03a  | nd          | nd          | nd         | nd         | 2.26±0.32a  | nd         | nd          | nd         | nd         | 2.03±0.06b  |
| B6                   | nd         | nd         | nd          | nd          | 21.30±0.56a | nd          | nd          | nd         | nd         | 18.50±0.41b | nd         | nd          | nd         | nd         | 18.05±0.21b |
| B7                   | nd         | nd         | 2.36±0.11a  | nd          | nd          | nd          | nd          | 0.49±0.02b | nd         | nd          | nd         | nd          | 0.48±0.02b | nd         | nd          |
| B8                   | 2.37±0.19b | 0.45±0.03e | nd          | 2.77±0.12a  | nd          | 0.47±0.02e  | 0.39±0.02e  | nd         | 1.31±0.06c | nd          | 0.46±0.03e | 0.64±0.06d  | nd         | 1.27±0.13c | nd          |
| B9                   | nd         | nd         | nd          | nd          | 0.06±0.00a  | nd          | nd          | nd         | nd         | 0.03±0.00b  | nd         | nd          | nd         | nd         | 0.03±0.00b  |
| B10                  | nd         | nd         | nd          | 2.29±0.22a  | nd          | nd          | nd          | nd         | 1.26±0.03b | nd          | nd         | nd          | nd         | 1.31±0.15b | nd          |
| B11                  | nd         | nd         | nd          | nd          | 0.58±0.08b  | nd          | nd          | nd         | nd         | 0.37±0.02c  | nd         | nd          | nd         | nd         | 0.96±0.02a  |

|                       |               |               |              |               |               |               |               |               |               |              |              |              |              |              |              |
|-----------------------|---------------|---------------|--------------|---------------|---------------|---------------|---------------|---------------|---------------|--------------|--------------|--------------|--------------|--------------|--------------|
| B12                   | nd            | nd            | nd           | 0.95±0.05a    | nd            | nd            | nd            | nd            | 0.50±0.03b    | nd           | nd           | nd           | nd           | 0.41±0.02c   | nd           |
| B13                   | nd            | nd            | nd           | nd            | 0.27±0.03b    | nd            | nd            | nd            | nd            | 0.17±0.02c   | nd           | nd           | nd           | nd           | 0.39±0.02a   |
| B14                   | nd            | nd            | nd           | 7.75±0.42a    | nd            | nd            | nd            | nd            | 1.24±0.02b    | nd           | nd           | nd           | nd           | 1.18±0.01c   | nd           |
| B15                   | nd            | nd            | 0.84±0.09b   | nd            | nd            | nd            | nd            | 1.02±0.21a    | nd            | nd           | nd           | nd           | 0.76±0.11b   | nd           | nd           |
| B16                   | nd            | nd            | nd           | 0.95±0.15a    | nd            | nd            | nd            | nd            | 0.40±0.02b    | nd           | nd           | nd           | nd           | 0.40±0.02b   | nd           |
| B17                   | nd            | nd            | nd           | 1.02±0.10a    | nd            | nd            | nd            | nd            | 0.27±0.01b    | nd           | nd           | nd           | nd           | 0.13±0.00c   | nd           |
| B18                   | nd            | nd            | nd           | nd            | 0.79±0.12a    | nd            | nd            | nd            | nd            | 0.37±0.03b   | nd           | nd           | nd           | nd           | 0.20±0.02c   |
| B19                   | 0.04±0.00d    | nd            | nd           | 0.39±0.03a    | nd            | 0.03±0.00e    | nd            | nd            | 0.28±0.03b    | nd           | 0.04±0.00dd  | nd           | nd           | 0.22±0.01c   | nd           |
| B20                   | nd            | nd            | nd           | 2.98±0.33a    | nd            | nd            | nd            | nd            | 1.68±0.12b    | nd           | nd           | nd           | nd           | 0.09±0.00c   | nd           |
| B21                   | 0.06±0.02a    | nd            | nd           | nd            | nd            | 0.04±0.02a    | nd            | nd            | nd            | nd           | 0.05±0.03a   | nd           | nd           | nd           | nd           |
| B22                   | nd            | nd            | nd           | 0.62±0.11a    | nd            | nd            | nd            | nd            | 0.34±0.05b    | nd           | nd           | nd           | nd           | 0.35±0.01b   | nd           |
| B23                   | nd            | nd            | nd           | 0.19±0.02b    | nd            | nd            | nd            | nd            | 0.15±0.03b    | nd           | nd           | nd           | nd           | 0.23±0.00a   | nd           |
| B24                   | nd            | nd            | nd           | 3.13±0.12b    | nd            | nd            | nd            | nd            | 2.42±0.22c    | nd           | nd           | nd           | nd           | 4.05±0.02a   | nd           |
| Total                 | 7.62±0.04h    | 5.51±0.06j    | 10.53±0.10f  | 33.08±0.11a   | 28.46±0.13b   | 4.68±0.03l    | 4.65±0.08l    | 7.92±0.06g    | 17.62±0.16e   | 24.85±0.16c  | 5.03±0.06k   | 3.90±0.26m   | 7.29±0.15i   | 17.54±0.22e  | 24.36±0.31d  |
| Hydroxycinnamic acids |               |               |              |               |               |               |               |               |               |              |              |              |              |              |              |
| C1                    | 0.25±0.03cdef | 0.19±0.01fg   | 0.30±0.02bcd | 0.31±0.01bc   | 0.23±0.01efg  | 0.23±0.01efg  | 0.22±0.01efg  | 0.18±0.11g    | 0.35±0.02ab   | 0.21±0.02fg  | 0.28±0.02cde | 0.23±0.02efg | 0.25±0.02def | 0.40±0.02a   | 0.23±0.01efg |
| C2                    | 3.53±0.22a    | 3.48±0.34a    | 3.44±0.03a   | 3.09±0.22b    | 3.13±0.11b    | 2.87±0.05bc   | 2.89±0.03bc   | 2.89±0.12bc   | 2.64±0.22cd   | 2.60±0.11cd  | 2.68±0.10cd  | 2.80±0.22bc  | 2.84±0.24bc  | 2.43±0.11d   | 2.55±0.23cd  |
| C3                    | 0.24±0.03cde  | 0.28±0.01abcd | 0.31±0.05ab  | 0.34±0.11a    | 0.26±0.01bcde | 0.25±0.03bcde | 0.19±0.03e    | 0.21±0.01e    | 0.33±0.01a    | 0.21±0.02e   | 0.19±0.01e   | 0.20±0.02e   | 0.21±0.03de  | 0.30±0.01abc | 0.21±0.02e   |
| C4                    | 0.08±0.00c    | 0.08±0.01c    | 0.15±0.01a   | 0.05±0.00e    | 0.15±0.00a    | 0.05±0.00e    | 0.07±0.00cd   | 0.07±0.01cd   | nd            | 0.15±0.01a   | 0.06±0.00de  | 0.07±0.00cd  | 0.10±0.01b   | nd           | 0.15±0.01a   |
| C5                    | 0.63±0.12a    | 0.57±0.06ab   | 0.56±0.12abc | 0.53±0.02abcd | 0.50±0.08bcde | 0.49±0.03bcde | 0.47±0.06bcde | 0.48±0.01bcde | 0.44±0.02de   | 0.40±0.02e   | 0.28±0.03f   | 0.45±0.02de  | 0.46±0.03cde | 0.41±0.02e   | 0.40±0.03e   |
| Total                 | 4.73±0.08a    | 4.59±0.03a    | 4.76±0.06a   | 4.32±0.05b    | 4.27±0.08b    | 3.89±0.06c    | 3.84±0.10c    | 3.83±0.08c    | 3.76±0.05c    | 3.57±0.10d   | 3.49±0.12d   | 3.75±0.10c   | 3.86±0.15c   | 3.54±0.13d   | 3.54±0.20d   |
| Dihydrochalcones      |               |               |              |               |               |               |               |               |               |              |              |              |              |              |              |
| D1                    | 1.29±0.06a    | 1.32±0.08a    | 1.15±0.04b   | 1.09±0.12bc   | 0.90±0.22ef   | 1.03±0.03bcde | 1.05±0.01bcd  | 0.90±0.01ef   | 0.97±0.00cde  | 0.74±0.04g   | 0.96±0.05cde | 0.91±0.05def | 0.78±0.03fg  | 0.76±0.01g   | 0.65±0.06g   |
| D2                    | 1.37±0.02a    | 1.07±0.03bcd  | 1.13±0.10b   | 1.11±0.02bc   | 0.83±0.09e    | 0.98±0.05d    | 0.79±0.01e    | 0.78±0.02e    | 0.78±0.06e    | 0.60±0.08f   | 1.03±0.06cd  | 0.82±0.01e   | 0.80±0.05e   | 0.77±0.03e   | 0.53±0.02f   |
| Total                 | 2.66±0.08a    | 2.39±0.06b    | 2.27±0.10bc  | 2.20±0.04c    | 1.73±0.15fg   | 2.01±0.04d    | 1.84±0.03e    | 1.68±0.02gh   | 1.75±0.03fg   | 1.34±0.10j   | 1.99±0.06d   | 1.73±0.05fg  | 1.58±0.11hi  | 1.53±0.04i   | 1.18±0.08k   |
| Flavan-3-ols          |               |               |              |               |               |               |               |               |               |              |              |              |              |              |              |
| E1                    | 0.90±0.10cde  | 0.82±0.04def  | 10.31±0.54a  | 1.20±0.03c    | 1.12±0.04cd   | 0.50±0.05fgh  | 0.55±0.02efgh | 8.10±0.44b    | 0.56±0.08efgh | 0.75±0.03efg | 0.36±0.03h   | 0.45±0.02gh  | 7.91±0.12b   | 0.85±0.01def | 0.77±0.02efg |

|                 |              |              |              |               |              |               |              |                |              |              |                |              |               |               |              |
|-----------------|--------------|--------------|--------------|---------------|--------------|---------------|--------------|----------------|--------------|--------------|----------------|--------------|---------------|---------------|--------------|
| E2              | 1.19±0.12f   | 0.93±0.03g   | 1.68±0.21e   | 4.39±0.22a    | 4.02±0.13b   | 0.36±0.04i    | 0.62±0.03h   | 0.91±0.24g     | 2.26±0.06c   | 2.44±0.04c   | 0.32±0.02i     | 0.19±0.01i   | 0.64±0.03h    | 2.03±0.04d    | 2.32±0.08c   |
| E3              | 3.76±0.22a   | 3.53±0.11ab  | 3.60±0.42a   | 3.74±0.10a    | 3.28±0.12b   | 1.85±0.12c    | 1.46±0.03de  | 1.49±0.03de    | 1.81±0.24c   | 1.62±0.11cd  | 1.41±0.02de    | 1.24±0.04e   | 1.39±0.03de   | 1.43±0.11de   | 0.34±0.02f   |
| E4              | 1.08±0.12c   | 0.96±0.06d   | 4.62±0.12a   | 0.83±0.02e    | 0.56±0.03f   | 0.06±0.00j    | 0.14±0.00j   | 1.18±0.02b     | 0.24±0.07i   | 0.36±0.01gh  | 0.42±0.02g     | 0.27±0.04ki  | 1.06±0.04c    | 0.23±0.01i    | 0.27±0.02i   |
| E5              | 0.58±0.02b   | 0.56±0.03b   | 0.66±0.05a   | 0.50±0.04c    | 0.26±0.00d   | 0.02±0.00i    | 0.07±0.00gh  | 0.12±0.00f     | 0.27±0.02d   | 0.16±0.01e   | 0.07±0.02gh    | 0.05±0.00hi  | 0.09±0.01fg   | 0.25±0.02d    | 0.06±0.00gh  |
| Total           | 7.51±0.41i   | 6.80±0.35ij  | 20.87±0.24h  | 10.66±0.09i   | 9.24±0.64i   | 2.79±0.21j    | 2.84±0.08j   | 181.00±1.87d   | 226.56±4.15b | 268.81±2.34a | 177.74±2.11de  | 163.18±1.75g | 175.47±4.54e  | 169.41±3.68f  | 205.98±4.22c |
| PP*             | 223.40±9.53d | 204.72±5.63e | 205.39±4.91e | 281.04±11.22b | 325.63±8.64a | 179.22±3.37fg | 184.32±2.11f | 169.20±5.41ghi | 221.42±8.12d | 263.48±2.54c | 175.16±2.54fgh | 160.98±2.11i | 164.38±5.41hi | 164.62±8.12hi | 202.22±6.81e |
| DP <sup>§</sup> | 7.54         | 6.95         | 7.75         | 7.82          | 7.00         | 61.93         | 70.33        | 73.23          | 65.41        | 165.56       | 68.61          | 95.32        | 55.76         | 69.89         | 176.40       |
| Flavonols       |              |              |              |               |              |               |              |                |              |              |                |              |               |               |              |
| F1              | nd           | 1.81±0.22a   | nd           | nd            | nd           | nd            | 1.60±0.03b   | nd             | nd           | nd           | nd             | 1.60±0.05b   | nd            | nd            | nd           |
| F2              | nd           | 0.12±0.01b   | nd           | nd            | nd           | nd            | 0.13±0.00b   | nd             | nd           | nd           | nd             | 0.17±0.00a   | nd            | nd            | nd           |
| F3              | nd           | 0.26±0.26a   | nd           | nd            | nd           | nd            | 0.17±0.03a   | nd             | nd           | nd           | nd             | 0.19±0.02a   | nd            | nd            | nd           |
| F4              | nd           | nd           | nd           | 0.06±0.00c    | 0.12±0.01a   | nd            | nd           | nd             | 0.04±0.00e   | 0.06±0.00c   | nd             | nd           | nd            | 0.07±0.00b    | 0.05±0.00d   |
| F5              | nd           | nd           | 1.19±0.02a   | nd            | nd           | nd            | nd           | 0.86±0.05b     | nd           | nd           | nd             | nd           | 0.69±0.04c    | nd            | nd           |
| F6              | nd           | 2.09±0.12a   | nd           | 0.05±0.00d    | nd           | nd            | 1.75±0.06b   | nd             | 0.05±0.00d   | nd           | nd             | 1.66±0.11c   | nd            | 0.05±0.00d    | nd           |
| F7              | nd           | nd           | 8.69±0.34a   | nd            | 0.26±0.04c   | nd            | nd           | 6.54±0.12b     | nd           | 0.22±0.01d   | nd             | nd           | 6.68±0.15b    | nd            | 0.20±0.01d   |
| F8              | nd           | nd           | 0.40±0.01a   | nd            | 0.03±0.00e   | nd            | nd           | 0.31±0.01c     | nd           | 0.02±0.00f   | nd             | nd           | 0.35±0.01b    | nd            | 0.05±0.00d   |
| F9              | nd           | 0.95±0.11a   | nd           | nd            | nd           | nd            | 0.72±0.02b   | nd             | nd           | nd           | nd             | 0.72±0.03b   | nd            | nd            | nd           |
| F10             | nd           | nd           | nd           | nd            | 0.10±0.00a   | nd            | nd           | nd             | nd           | 0.04±0.00c   | nd             | nd           | nd            | nd            | 0.06±0.00b   |
| F11             | nd           | 11.34±0.24a  | nd           | nd            | nd           | nd            | 9.38±0.22b   | nd             | nd           | nd           | nd             | 9.21±0.22b   | nd            | nd            | nd           |
| F12             | nd           | nd           | 1.09±0.03a   | nd            | nd           | nd            | nd           | 0.66±0.02c     | nd           | nd           | nd             | nd           | 0.72±0.03b    | nd            | nd           |
| F13             | nd           | 0.18±0.00b   | nd           | nd            | nd           | nd            | 0.10±0.00c   | nd             | nd           | nd           | nd             | 0.21±0.02a   | nd            | nd            | nd           |
| F14             | nd           | nd           | 5.47±0.24a   | nd            | 0.07±0.00c   | nd            | nd           | 4.45±0.20b     | nd           | 0.04±0.00c   | nd             | nd           | 4.33±0.15b    | nd            | 0.03±0.00c   |
| F15             | 0.31±0.02d   | 0.29±0.03de  | 0.62±0.14b   | 0.99±0.12a    | 0.45±0.02c   | 0.20±0.01ef   | 0.17±0.01f   | 0.49±0.02c     | 0.65±0.03b   | 0.26±0.01def | 0.23±0.02def   | 0.21±0.01ef  | 0.49±0.03c    | 0.67±0.05b    | 0.25±0.02def |
| F16             | 0.07±0.00g   | 0.39±0.03a   | 0.17±0.01d   | 0.28±0.02b    | 0.16±0.01de  | 0.02±0.00h    | 0.23±0.01c   | 0.13±0.01f     | 0.14±0.01ef  | 0.08±0.01g   | 0.06±0.00g     | 0.28±0.01b   | 0.14±0.01ef   | 0.16±0.01de   | 0.08±0.00g   |
| F17             | nd           | nd           | nd           | 0.42±0.02a    | nd           | nd            | nd           | nd             | 0.24±0.02b   | nd           | nd             | nd           | nd            | 0.26±0.02b    | nd           |
| F18             | nd           | 0.21±0.03c   | nd           | nd            | nd           | nd            | 0.79±0.03b   | nd             | nd           | nd           | nd             | 0.95±0.04a   | nd            | nd            | nd           |
| F19             | 0.14±0.01cd  | 1.26±0.12a   | 0.05±0.00ef  | 0.19±0.01c    | 0.07±0.00def | 0.03±0.01f    | 0.84±0.04b   | 0.04±0.00ef    | 0.10±0.00def | 0.04±0.00ef  | 0.05±0.00ef    | 0.15±0.12cd  | 0.05±0.00ef   | 0.12±0.00cde  | 0.04±0.00ef  |
| F20             | nd           | nd           | nd           | 0.43±0.03a    | nd           | nd            | nd           | nd             | 0.20±0.02b   | nd           | nd             | nd           | nd            | 0.21±0.02b    | nd           |

|                                                                         |                   |                    |                    |                   |                   |                   |                    |                    |                   |                   |                   |                    |                    |                   |                   |
|-------------------------------------------------------------------------|-------------------|--------------------|--------------------|-------------------|-------------------|-------------------|--------------------|--------------------|-------------------|-------------------|-------------------|--------------------|--------------------|-------------------|-------------------|
| F21                                                                     | 0.21±0.02d        | 0.11±0.01fg        | 0.17±0.02e         | 0.53±0.06a        | 0.47±0.04b        | 0.11±0.01fg       | 0.05±0.00h         | 0.08±0.00gh        | 0.29±0.01c        | 0.26±0.02c        | 0.14±0.02ef       | 0.11±0.00fg        | 0.06±0.00h         | 0.28±0.02c        | 0.21±0.01d        |
| F22                                                                     | 0.38±0.03efg      | 1.34±0.20a         | 0.84±0.05bc        | 0.34±0.03fgh      | 0.79±0.04c        | 0.17±0.02j        | 0.64±0.00d         | 0.49±0.02e         | 0.22±0.01ij       | 0.45±0.03ef       | 0.30±0.03ghi      | 0.91±0.07b         | 0.43±0.02ef        | 0.24±0.01hij      | 0.38±0.02fg       |
| F23                                                                     | nd                | 0.26±0.01a         | nd                 | nd                | nd                | nd                | 0.16±0.02b         | nd                 | nd                | nd                | nd                | 0.14±0.01b         | nd                 | nd                | nd                |
| F24                                                                     | nd                | nd                 | nd                 | 0.10±0.00a        | nd                | nd                | nd                 | nd                 | 0.05±0.00c        | nd                | nd                | nd                 | nd                 | 0.07±0.00b        | nd                |
| F25                                                                     | nd                | nd                 | 0.37±0.02a         | nd                | nd                | nd                | nd                 | 0.14±0.01c         | nd                | nd                | nd                | nd                 | 0.19±0.01b         | nd                | nd                |
| F26                                                                     | nd                | nd                 | nd                 | 0.02±0.02a        | nd                | nd                | nd                 | nd                 | 0.01±0.01a        | nd                | nd                | nd                 | nd                 | 0.02±0.02a        | nd                |
| F27                                                                     | nd                | nd                 | nd                 | 0.04±0.00a        | nd                | nd                | nd                 | nd                 | 0.02±0.00b        | nd                | nd                | nd                 | nd                 | 0.02±0.00b        | nd                |
| F28                                                                     | nd                | nd                 | nd                 | 4.04±0.24a        | nd                | nd                | nd                 | nd                 | 2.20±0.12b        | nd                | nd                | nd                 | nd                 | 2.04±0.14c        | nd                |
| F29                                                                     | nd                | nd                 | nd                 | 0.02±0.00a        | nd                | nd                | nd                 | nd                 | nd                | nd                | nd                | nd                 | nd                 | nd                | nd                |
| <b>Total</b>                                                            | <b>1.11±0.03k</b> | <b>21.61±0.08a</b> | <b>19.06±0.10b</b> | <b>7.51±0.08f</b> | <b>2.52±0.03h</b> | <b>0.53±0.02m</b> | <b>16.73±0.08c</b> | <b>14.19±0.06e</b> | <b>4.21±0.10g</b> | <b>1.47±0.04i</b> | <b>0.78±0.02l</b> | <b>16.51±0.12d</b> | <b>14.13±0.09e</b> | <b>4.21±0.03g</b> | <b>1.35±0.06j</b> |
| <b>Total phenolic compounds (including polymeric proanthocyanidins)</b> |                   |                    |                    |                   |                   |                   |                    |                    |                   |                   |                   |                    |                    |                   |                   |
|                                                                         | 247.03±5.32f      | 247.92±4.12f       | 285.42±5.26d       | 341.65±2.12b      | 372.34±3.22a      | 193.12±2.33jk     | 215.17±2.11h       | 216.11±3.15h       | 254.34±2.51e      | 300.09±4.12c      | 189.03±1.02k      | 189.72±2.13k       | 207.81±0.87i       | 196.46±0.45j      | 236.41±1.22g      |

Data are given as mean ± standard deviation ( $n = 3$ ). Mean values within a line with different letters (a-n) are significantly different (homogenous groups) at  $p \leq 0.05$ . \* PP: polymeric proanthocyanidins, quantitative data of were obtained using the phloroglucinol method; § DP: Degree of polymerisation.



**Table S9.** Antioxidant activity of analysed persimmon/apple smoothies before (T0) and after storage (3 and 6 months).

| Sample          | 0 months (T0)   |                      |                   |                   |                   |                     | 3 months (T3)   |                     |                   |                   |                   |                     | 6 months (T6)   |                     |                   |                   |                   |                     |
|-----------------|-----------------|----------------------|-------------------|-------------------|-------------------|---------------------|-----------------|---------------------|-------------------|-------------------|-------------------|---------------------|-----------------|---------------------|-------------------|-------------------|-------------------|---------------------|
|                 | TP <sup>†</sup> | CUPRAC <sup>†‡</sup> | FRAP <sup>‡</sup> | ORAC <sup>‡</sup> | DPPH <sup>‡</sup> | ABTS <sup>•+‡</sup> | TP <sup>†</sup> | CUPRAC <sup>‡</sup> | FRAP <sup>‡</sup> | ORAC <sup>‡</sup> | DPPH <sup>‡</sup> | ABTS <sup>•+‡</sup> | TP <sup>†</sup> | CUPRAC <sup>‡</sup> | FRAP <sup>‡</sup> | ORAC <sup>‡</sup> | DPPH <sup>‡</sup> | ABTS <sup>•+‡</sup> |
| <b>Dk/Md</b>    | 238.04 ± 10.16a | 7.01 ± 0.07a         | 1.78 ± 0.16b      | 4.47 ± 0.28a      | 1.26 ± 0.02a      | 1.83 ± 0.04d        | 94.98 ± 2.92gh  | 2.82 ± 0.02i        | 0.77 ± 0.02h      | 1.63 ± 0.11g      | 0.59 ± 0.02g      | 0.84 ± 0.03l        | 81.34 ± 5.52i   | 2.35 ± 0.02j        | 0.62 ± 0.01i      | 1.61 ± 0.20g      | 0.55 ± 0.01g      | 0.61 ± 0.00n        |
| <b>Dk/Md+Cs</b> | 173.23 ± 8.73c  | 6.36 ± 0.05b         | 1.25 ± 0.02d      | 2.70 ± 0.01de     | 0.92 ± 0.02d      | 1.09 ± 0.02j        | 106.08 ± 6.70fg | 2.91 ± 0.13i        | 0.73 ± 0.00h      | 1.99 ± 0.05f      | 0.56 ± 0.05g      | 0.77 ± 0.00m        | 93.96 ± 4.23h   | 2.85 ± 0.20i        | 0.72 ± 0.02h      | 1.98 ± 0.10f      | 0.55 ± 0.01g      | 0.74 ± 0.00m        |
| <b>Dk/Md+Mc</b> | 210.20 ± 10.41b | 5.50 ± 0.11c         | 1.91 ± 0.04a      | 3.34 ± 0.21c      | 1.25 ± 0.07ab     | 2.06 ± 0.02a        | 153.13 ± 9.11d  | 4.56 ± 0.14e        | 1.19 ± 0.02d      | 1.95 ± 0.18f      | 0.81 ± 0.01e      | 1.28 ± 0.01g        | 140.95 ± 3.90e  | 4.31 ± 0.19f        | 1.17 ± 0.03e      | 1.62 ± 0.15g      | 0.80 ± 0.02e      | 1.24 ± 0.02h        |
| <b>Dk/Md+As</b> | 198.20 ± 5.37b  | 6.15 ± 0.04b         | 1.83 ± 0.01b      | 3.63 ± 0.22b      | 1.24 ± 0.03ab     | 2.01 ± 0.02b        | 158.58 ± 7.88d  | 4.66 ± 0.26e        | 1.45 ± 0.01c      | 2.54 ± 0.16de     | 1.04 ± 0.02c      | 1.61 ± 0.03e        | 147.37 ± 6.38de | 4.05 ± 0.14g        | 1.43 ± 0.03c      | 2.42 ± 0.05e      | 1.03 ± 0.03c      | 1.45 ± 0.03f        |
| <b>Dk/Md+Au</b> | 207.01 ± 5.62b  | 5.09 ± 0.09d         | 1.83 ± 0.01b      | 3.64 ± 0.27b      | 1.20 ± 0.04b      | 1.97 ± 0.03c        | 139.96 ± 5.13e  | 3.92 ± 0.18g        | 1.05 ± 0.01f      | 2.82 ± 0.16d      | 0.73 ± 0.02f      | 1.16 ± 0.01i        | 112.58 ± 5.79f  | 3.24 ± 0.12h        | 0.95 ± 0.01g      | 1.77 ± 0.04fg     | 0.69 ± 0.01f      | 1.01 ± 0.01k        |

<sup>†</sup>mg GAE/100 g fw; <sup>‡</sup>mmol Trolox/100 g fw; <sup>‡‡</sup>mmol Trolox/100 g fw. Data are given as mean ± standard deviation ( $n = 3$ ). Mean values within columns presenting the same properties immediately after processing, after 3 months, and after 6 months of storage with different letters (a-n) are significantly different (homogenous groups) at  $p \leq 0.05$ .

**Table S10.** Digestive enzymes inhibitory activities (IC<sub>50</sub>, mg fw/mL) of analysed persimmon/apple fruit smoothies before and after storage(T0) and after storage (3 and 6 months).

| Sample          | 0 months (T0)          |                            |                                | 3 months (T3)          |                            |                                | 6 months (T6)          |                            |                                |
|-----------------|------------------------|----------------------------|--------------------------------|------------------------|----------------------------|--------------------------------|------------------------|----------------------------|--------------------------------|
|                 | <sup>†</sup> α-amylase | <sup>†</sup> α-glucosidase | <sup>†</sup> pancreatic lipase | <sup>†</sup> α-amylase | <sup>†</sup> α-glucosidase | <sup>†</sup> pancreatic lipase | <sup>†</sup> α-amylase | <sup>†</sup> α-glucosidase | <sup>†</sup> pancreatic lipase |
| <b>Dk/Md</b>    | 95.68 ± 0.03h          | 15.37 ± 0.03a              | 4.94 ± 0.11g                   | 93.21 ± 0.11g          | 68.82 ± 0.12g              | 4.85 ± 0.01g                   | 104.51 ± 0.15j         | 99.29 ± 0.01j              | 9.11 ± 0.11j                   |
| <b>Dk/Md+Cs</b> | 72.49 ± 0.01c          | 20.08 ± 0.01b              | 3.78 ± 0.04c                   | 99.34 ± 0.09i          | 55.75 ± 0.06f              | 4.52 ± 0.11e                   | 105.89 ± 0.09k         | 98.81 ± 0.22i              | 8.87 ± 0.02i                   |
| <b>Dk/Md+Mc</b> | 69.11 ± 0.04b          | 15.32 ± 0.00a              | 3.93 ± 0.03d                   | 86.02 ± 0.08d          | 24.88 ± 0.01c              | 4.67 ± 0.08f                   | 91.05 ± 0.14f          | 36.07 ± 0.11e              | 9.24 ± 0.05j                   |
| <b>Dk/Md+As</b> | 155.46 ± 0.22m         | 72.10 ± 0.23h              | 3.38 ± 0.11b                   | 175.19 ± 0.15n         | 99.51 ± 0.00j              | 4.81 ± 0.11g                   | 198.85 ± 0.21o         | 98.80 ± 0.12i              | 10.97 ± 0.03k                  |
| <b>Dk/Md+Au</b> | 63.98 ± 0.01a          | 27.32 ± 0.05d              | 3.17 ± 0.08a                   | 87.92 ± 0.11e          | 27.10 ± 0.42d              | 8.74 ± 0.09h                   | 121.97 ± 0.54l         | 103.71 ± 0.31k             | 9.23 ± 0.05j                   |

<sup>†</sup>mg fw/mL. Data are given as mean ± standard deviation ( $n = 3$ ). Mean values within columns presenting the same characteristics/properties immediately after processing, after 3 months of storage, and after 6 months of storage with different letters (a-o) are significantly different (homogenous groups) at  $p \leq 0.05$ .
